# Supplementary material for: Medical Service Utilization and Direct Medical Cost of Stroke in Urban China
Source: PubMed Central journal article supplement (PMC9278468; doi:10.34172/ijhpm.2020.111), 2020-07-20
Supplement: ijhpm-11-277-s001.pdf [file ijhpm-11-277-s001.pdf]

---

## Supplementary file 1

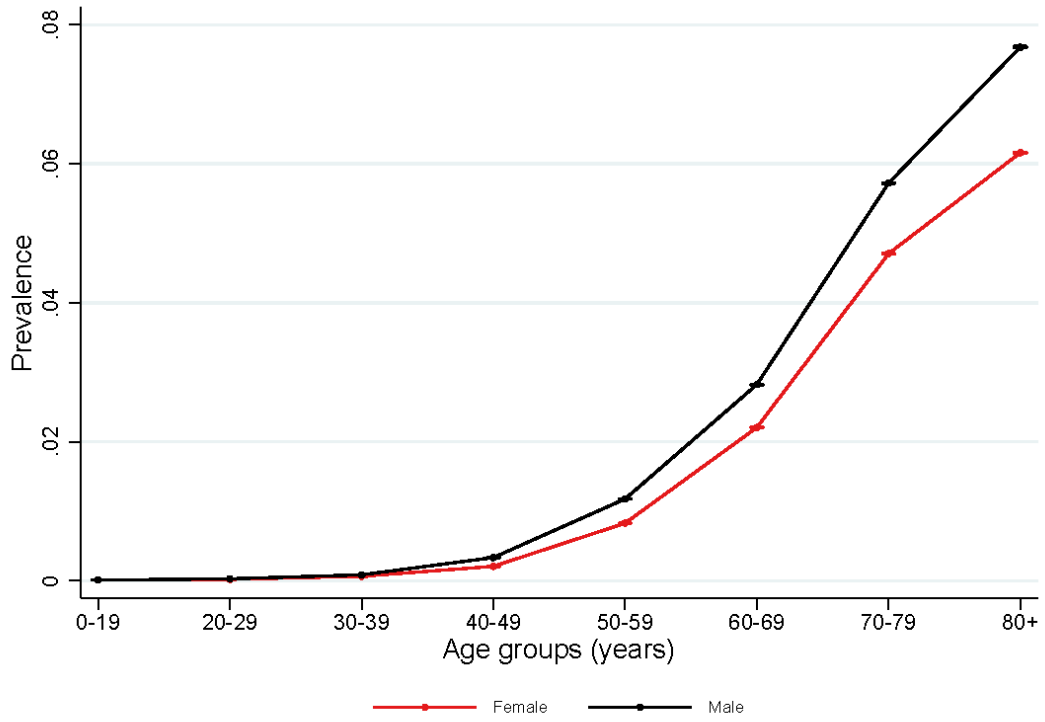

**Figure S1.** Prevalence of stroke (with 95% CI) in urban China in 2013 to 2016 by age and sex.

**Table S1.** Direct medical expenditure of stroke in USD and EUR respectively

|                          | <b>Annual direct medical cost per person, USD</b> | <b>Annual OOP per person, USD</b> | <b>Total direct medical cost, Billion USD</b> | <b>Annual direct medical cost per person, EUR</b> | <b>Annual OOP per person, EUR</b> | <b>Total direct medical cost, Billion EUR</b> |
|--------------------------|---------------------------------------------------|-----------------------------------|-----------------------------------------------|---------------------------------------------------|-----------------------------------|-----------------------------------------------|
| <b>Pathological type</b> |                                                   |                                   |                                               |                                                   |                                   |                                               |
| Ischemic                 | 1530.5(1503.5,1557.5)                             | 429.3(420.7,437.9)                | 21.9(21.6,22.3)                               | 1263.1(1240.8,1285.4)                             | 354.3(347.2,361.4)                | 18.1(17.8,18.4)                               |
| Hemorrhagic              | 3162.8(2996.7,3328.9)                             | 1021.1(960.4,1081.8)              | 8.7(8.2,9.1)                                  | 2610.3(2473.3,2747.4)                             | 842.7(792.7,892.8)                | 7.2(6.8,7.5)                                  |
| Undetermined             | 609.3(533.6,685.0)                                | 147.9(132.2,163.7)                | 1.1(0.9,1.2)                                  | 502.9(440.4,565.3)                                | 122.1(109.1,135.1)                | 0.9(0.8,1.0)                                  |
| <b>Gender</b>            |                                                   |                                   |                                               |                                                   |                                   |                                               |
| Female                   | 1469.0(1428.0,1510.0)                             | 456.7(442.4,471.1)                | 12.5(12.1,12.8)                               | 1212.4(1178.6,1246.2)                             | 376.9(365.1,388.8)                | 10.3(10.0,10.6)                               |
| Male                     | 1856.2(1808.7,1903.6)                             | 515.5(500.1,531.0)                | 19.2(18.7,19.7)                               | 1532.0(1492.8,1571.1)                             | 425.5(412.7,438.2)                | 15.8(15.4,16.3)                               |
| <b>Age group</b>         |                                                   |                                   |                                               |                                                   |                                   |                                               |
| 0-19                     | 1385.1(950.0,1820.2)                              | 694.5(443.8,945.2)                | 0.1(0.0,0.1)                                  | 1143.1(784.0,1502.2)                              | 573.2(366.3,780.1)                | 0.1(0.0,0.1)                                  |
| 20-29                    | 1550.5(988.9,2112.1)                              | 482.8(307.4,658.1)                | 0.2(0.1,0.3)                                  | 1279.6(816.2,1743.1)                              | 398.5(253.7,543.2)                | 0.2(0.1,0.2)                                  |
| 30-39                    | 1477.3(1254.8,1699.8)                             | 457.0(382.3,531.6)                | 0.5(0.4,0.6)                                  | 1219.2(1035.6,1402.8)                             | 377.1(315.6,438.7)                | 0.4(0.4,0.5)                                  |
| 40-49                    | 1751.0(1543.8,1958.3)                             | 632.8(547.3,718.3)                | 2.2(2.0,2.5)                                  | 1445.2(1274.1,1616.2)                             | 522.3(451.7,592.8)                | 1.8(1.6,2.0)                                  |
| 50-59                    | 1607.5(1547.1,1667.8)                             | 526.9(504.3,549.4)                | 5.3(5.1,5.5)                                  | 1326.7(1276.8,1376.5)                             | 434.8(416.2,453.4)                | 4.4(4.2,4.5)                                  |
| 60-69                    | 1591.4(1535.8,1646.9)                             | 483.6(463.6,503.5)                | 8.5(8.2,8.8)                                  | 1313.4(1267.5,1359.2)                             | 399.1(382.6,415.5)                | 7.0(6.7,7.2)                                  |
| 70-79                    | 1670.5(1609.8,1731.1)                             | 449.9(433.2,466.7)                | 9.0(8.6,9.3)                                  | 1378.7(1328.6,1428.7)                             | 371.3(357.5,385.1)                | 7.4(7.1,7.7)                                  |
| 80+                      | 1941.2(1865.7,2016.7)                             | 467.5(448.9,486.0)                | 6.0(5.7,6.2)                                  | 1602.1(1539.8,1664.4)                             | 385.8(370.5,401.1)                | 4.9(4.7,5.1)                                  |
| <b>Insurance</b>         |                                                   |                                   |                                               |                                                   |                                   |                                               |
| URBMI                    | 1632.2(1573.3,1691.0)                             | 688.6(663.5,713.8)                | 9.9(9.5,10.2)                                 | 1347.0(1298.5,1395.6)                             | 568.3(547.6,589.1)                | 8.1(7.8,8.4)                                  |
| UEBMI                    | 1704.9(1666.6,1743.2)                             | 394.8(385.5,404.2)                | 21.8(21.3,22.3)                               | 1407.1(1375.4,1438.7)                             | 325.9(318.1,333.6)                | 18.0(17.6,18.4)                               |
| <b>Total</b>             | <b>1681.6(1649.5,1713.6)</b>                      | <b>489.0(478.3,499.7)</b>         | <b>31.7(31.1,32.3)</b>                        | <b>1387.8(1361.4,1414.3)</b>                      | <b>403.6(394.8,412.4)</b>         | <b>26.2(25.7,26.7)</b>                        |

Abbreviations: OOP, Out of Pocket. 95% CI in parentheses.

**Table S2.** Summary of average costs in USD and EUR respectively

|            | Average cost per visit, USD |                |                |                | Average OOP cost per visit, USD |                |               |               |
|------------|-----------------------------|----------------|----------------|----------------|---------------------------------|----------------|---------------|---------------|
|            | Ischemic                    | Hemorrhagic    | Undetermined   | Total          | Ischemic                        | Hemorrhagic    | Undetermined  | Total         |
| Outpatient | 72.1(113.8)                 | 67.5(166.0)    | 61.0(49.3)     | 69.6(116.8)    | 30.5(46.2)                      | 20.5(83.3)     | 16.3(27.4)    | 26.7(52.1)    |
| Pharmacies | 80.5(45.3)                  | 49.3(64.0)     | 56.3(69.6)     | 66.4(56.8)     | 59.9(35.4)                      | 6.5(17.3)      | 9.6(20.1)     | 35.8(39.1)    |
| Primary    | 52.3(70.6)                  | 68.4(70.8)     | 49.9(49.9)     | 53.6(68.4)     | 20.2(32.7)                      | 20.8(26.1)     | 11.0(22.3)    | 19.0(31.0)    |
| Secondary  | 69.7(83.3)                  | 70.7(89.8)     | 55.5(35.1)     | 66.6(76.4)     | 27.9(38.4)                      | 25.0(26.2)     | 14.3(17.8)    | 24.4(33.5)    |
| Tertiary   | 85.6(159.7)                 | 103.7(348.8)   | 70.9(56.2)     | 84.3(171.4)    | 30.3(56.9)                      | 46.4(183.8)    | 20.6(34.6)    | 29.8(73.9)    |
| Inpatient  | 1655.5(2163.4)              | 4244.0(6984.0) | 1804.0(2727.4) | 2007.9(3386.7) | 445.7(785.1)                    | 1388.6(3363.8) | 478.5(807.1)  | 573.6(1471.5) |
| Primary    | 909.0(1413.0)               | 1872.1(3768.7) | 704.2(1025.3)  | 989.9(1770.4)  | 194.3(391.9)                    | 466.7(1421.9)  | 150.2(225.1)  | 217.5(568.3)  |
| Secondary  | 1268.4(1330.0)              | 2787.8(5040.9) | 1701.7(2508.7) | 1462.3(2234.3) | 337.4(491.5)                    | 854.5(2432.0)  | 419.7(580.3)  | 402.2(982.6)  |
| Tertiary   | 2345.3(2800.2)              | 5751.0(8207.8) | 2328.0(3195.9) | 2904.7(4389.1) | 655.7(1048.1)                   | 1951.6(4039.0) | 660.1(1044.0) | 868.7(1956.9) |
|            | Average cost per visit, EUR |                |                |                | Average OOP cost per visit, EUR |                |               |               |
|            | Ischemic                    | Hemorrhagic    | Undetermined   | Total          | Ischemic                        | Hemorrhagic    | Undetermined  | Total         |
| Outpatient | 59.5(93.9)                  | 55.7(137.0)    | 50.3(40.7)     | 57.4(96.4)     | 25.2(38.1)                      | 17.0(68.7)     | 13.4(22.6)    | 22.0(43.0)    |
| Pharmacies | 66.5(37.4)                  | 40.7(52.8)     | 46.5(57.5)     | 54.8(46.8)     | 49.5(29.3)                      | 5.3(14.3)      | 7.9(16.6)     | 29.5(32.3)    |
| Primary    | 43.1(58.3)                  | 56.5(58.5)     | 41.2(41.1)     | 44.2(56.5)     | 16.7(27.0)                      | 17.1(21.5)     | 9.1(18.4)     | 15.7(25.6)    |
| Secondary  | 57.5(68.7)                  | 58.3(74.1)     | 45.8(28.9)     | 55.0(63.1)     | 23.0(31.7)                      | 20.6(21.6)     | 11.8(14.7)    | 20.1(27.6)    |
| Tertiary   | 70.7(131.8)                 | 85.6(287.9)    | 58.5(46.3)     | 69.6(141.4)    | 25.0(47.0)                      | 38.3(151.7)    | 17.0(28.6)    | 24.6(61.0)    |
| Inpatient  | 1366.3(1785.5)              | 3502.6(5764.0) | 1488.8(2251.0) | 1657.2(2795.1) | 367.8(647.9)                    | 1146.0(2776.2) | 394.9(666.1)  | 473.4(1214.5) |
| Primary    | 750.2(1166.2)               | 1545.0(3110.4) | 581.2(846.2)   | 817.0(1461.1)  | 160.4(323.4)                    | 385.2(1173.5)  | 123.9(185.8)  | 179.5(469.0)  |
| Secondary  | 1046.8(1097.7)              | 2300.8(4160.3) | 1404.4(2070.5) | 1206.8(1844.0) | 278.5(405.7)                    | 705.2(2007.2)  | 346.4(478.9)  | 331.9(810.9)  |
| Tertiary   | 1935.6(2311.0)              | 4746.4(6774.0) | 1921.4(2637.6) | 2397.3(3622.4) | 541.1(865.0)                    | 1610.7(3333.5) | 544.8(861.6)  | 717.0(1615.0) |

Standard deviation in parentheses.

**Table S3.** Results of the multivariate analyses

|                   | Outpatient                          |                        |                            | Inpatient                              |                            |                                |
|-------------------|-------------------------------------|------------------------|----------------------------|----------------------------------------|----------------------------|--------------------------------|
|                   | The average number of annual visits | Average cost per visit | Average OOP cost per visit | The average number of annual admission | Average cost per admission | Average OOP cost per admission |
| Pathological type |                                     |                        |                            |                                        |                            |                                |
| Hemorrhagic       | -0.003(0.001) ***                   | -0.059(0.001) ***      | -0.390(0.001) ***          | -0.063(0.001) ***                      | 0.962(0.001) ***           | 1.093(0.001) ***               |
| Undetermined      | 0.338(0.001) ***                    | -0.170(0.001) ***      | -0.572(0.001) ***          | -1.220(0.002) ***                      | 0.090(0.002) ***           | 0.076(0.003) ***               |
| Gender            |                                     |                        |                            |                                        |                            |                                |
| Male              | 0.089(0.000) ***                    | -0.002(0.001) **       | 0.063(0.001) ***           | 0.185(0.001) ***                       | 0.034(0.001) ***           | 0.008(0.001) ***               |
| Age group         |                                     |                        |                            |                                        |                            |                                |
| 20-29             | -0.257(0.007) ***                   | -0.114(0.010) ***      | -0.117(0.016) ***          | -0.480(0.008) ***                      | 0.849(0.011) ***           | 0.494(0.015) ***               |
| 30-39             | -0.289(0.006) ***                   | -0.082(0.010) ***      | -0.112(0.015) ***          | 0.049(0.007) ***                       | 0.315(0.009) ***           | 0.201(0.012) ***               |
| 40-49             | -0.081(0.006) ***                   | 0.251(0.010) ***       | 0.093(0.015) ***           | 0.339(0.006) ***                       | 0.223(0.008) ***           | 0.166(0.012) ***               |
| 50-59             | 0.151(0.006) ***                    | 0.420(0.010) ***       | 0.178(0.015) ***           | 0.418(0.006) ***                       | 0.151(0.008) ***           | 0.056(0.012) ***               |
| 60-69             | 0.172(0.006) ***                    | 0.444(0.010) ***       | 0.170(0.015) ***           | 0.483(0.006) ***                       | 0.166(0.008) ***           | -0.014(0.012)                  |
| 70-79             | 0.137(0.006) ***                    | 0.457(0.010) ***       | 0.144(0.015) ***           | 0.538(0.006) ***                       | 0.222(0.008) ***           | -0.031(0.012) **               |
| 80+               | 0.040(0.006) ***                    | 0.428(0.010) ***       | 0.083(0.015) ***           | 0.574(0.006) ***                       | 0.378(0.008) ***           | -0.007(0.012)                  |
| Insurance         |                                     |                        |                            |                                        |                            |                                |
| UEBMI             | 0.881(0.001) ***                    | 0.522(0.001) ***       | 0.163(0.001) ***           | -0.283(0.001) ***                      | 0.288(0.001) ***           | -0.349(0.001) ***              |
| Year              |                                     |                        |                            |                                        |                            |                                |
| 2014.             | -0.038(0.001) ***                   | -0.169(0.001) ***      | 0.336(0.002) ***           | -0.138(0.001) ***                      | 0.030(0.001) ***           | 0.062(0.002) ***               |
| 2015.             | 0.397(0.001) ***                    | -0.091(0.001) ***      | 0.340(0.002) ***           | -0.102(0.001) ***                      | 0.087(0.001) ***           | 0.044(0.001) ***               |
| 2016.             | 0.450(0.001) ***                    | -0.119(0.001) ***      | 0.403(0.002) ***           | -0.050(0.001) ***                      | 0.123(0.001) ***           | 0.102(0.001) ***               |
| Constant          | -0.652(0.006) ***                   | 5.342(0.009) ***       | 4.614(0.015) ***           | -0.482(0.006) ***                      | 8.749(0.008) ***           | 8.076(0.012) ***               |

Standard errors in parentheses. \*\*\*  $P < .001$ , \*\*  $P < .01$ .

**Table S4** Medical cost associated with sociodemographic characteristics, pathological type and year in USD and EUR respectively

|                   | Outpatient (USD)            |                             | Inpatient (USD)                |                                |
|-------------------|-----------------------------|-----------------------------|--------------------------------|--------------------------------|
|                   | Average cost per visit      | Average OOP cost per visit  | Average cost per admission     | Average OOP cost per admission |
| <b>Baseline</b>   | 33.014(32.400,33.628)***    | 15.942(15.481,16.404)***    | 996.634(980.500,1012.767)***   | 508.280(496.776,519.784)***    |
| <b>Increment</b>  |                             |                             |                                |                                |
| Pathological type |                             |                             |                                |                                |
| Hemorrhagic       | -4.137(-4.261,-4.013)***    | -9.773(-9.836,-9.710)***    | 2667.429(2659.224,2675.634)*** | 889.516(885.991,893.041)***    |
| Undetermined      | -11.248(-11.361,-11.136)*** | -13.174(-13.231,-13.117)*** | 154.650(145.909,163.391)***    | 35.429(32.153,38.705)***       |
| Gender            |                             |                             |                                |                                |
| Male              | -0.131(-0.223,-0.040)**     | 1.660(1.606,1.714)***       | 68.134(65.309,70.959)***       | 4.740(3.601,5.879)***          |
| Age group         |                             |                             |                                |                                |
| 20-29             | -4.910(-5.820,-3.999)***    | -2.543(-3.259,-1.827)***    | 2143.280(2086.247,2200.312)*** | 360.147(338.491,381.803)***    |
| 30-39             | -3.578(-4.453,-2.704)***    | -2.453(-3.140,-1.767)***    | 592.095(563.452,620.738)***    | 125.441(111.611,139.271)***    |
| 40-49             | 13.028(12.165,13.891)***    | 2.260(1.584,2.935)***       | 399.713(373.382,426.043)***    | 101.576(88.639,114.513)***     |
| 50-59             | 23.818(22.963,24.674)***    | 4.481(3.811,5.152)***       | 262.021(236.062,287.980)***    | 32.214(19.450,44.978)***       |
| 60-69             | 25.512(24.659,26.365)***    | 4.263(3.594,4.933)***       | 288.690(262.786,314.593)***    | -7.720(-20.453,5.012)          |
| 70-79             | 26.462(25.609,27.315)***    | 3.581(2.911,4.250)***       | 397.358(371.425,423.290)***    | -17.320(-30.057,-4.584)**      |
| 80+               | 24.398(23.542,25.255)***    | 2.008(1.337,2.678)***       | 735.387(709.277,761.498)***    | -3.836(-16.603,8.931)          |
| Insurance         |                             |                             |                                |                                |
| UEBMI             | 30.093(30.002,30.183)***    | 4.083(4.015,4.151)***       | 558.271(555.531,561.010)***    | -205.744(-207.009,-204.480)*** |
| Year              |                             |                             |                                |                                |
| 2014.             | -11.965(-12.129,-11.801)*** | 7.695(7.613,7.777)***       | 57.203(53.146,61.261)***       | 34.816(33.150,36.482)***       |
| 2015.             | -6.671(-6.823,-6.518)***    | 7.796(7.726,7.866)***       | 169.755(165.884,173.625)***    | 24.545(23.013,26.077)***       |
| 2016.             | -8.657(-8.807,-8.507)***    | 9.568(9.497,9.638)***       | 244.763(240.948,248.577)***    | 58.144(56.618,59.669)***       |
|                   | Outpatient (EUR)            |                             | Inpatient (EUR)                |                                |
|                   | Average cost per visit      | Average OOP cost per visit  | Average cost per admission     | Average OOP cost per admission |

|                   |                           |                             |                                |                                |
|-------------------|---------------------------|-----------------------------|--------------------------------|--------------------------------|
| <b>Baseline</b>   | 27.247(26.740,27.754)***  | 13.158(12.777,13.539)***    | 822.538(809.223,835.853)***    | 419.491(409.997,428.986)***    |
| <b>Increment</b>  |                           |                             |                                |                                |
| Pathological type |                           |                             |                                |                                |
| Hemorrhagic       | -3.414(-3.517,-3.312)***  | -8.066(-8.118,-8.014)***    | 2201.472(2194.701,2208.244)*** | 734.132(731.222,737.041)***    |
| Undetermined      | -9.283(-9.376,-9.191)***  | -10.873(-10.920,-10.825)*** | 127.635(120.421,134.850)***    | 29.240(26.536,31.944)***       |
| Gender            |                           |                             |                                |                                |
| Male              | -0.108(-0.184,-0.033)**   | 1.370(1.325,1.415)***       | 56.232(53.900,58.563)***       | 3.912(2.972,4.852)***          |
| Age group         |                           |                             |                                |                                |
| 20-29             | -4.052(-4.804,-3.300)***  | -2.099(-2.690,-1.508)***    | 1768.883(1721.814,1815.953)*** | 297.235(279.362,315.108)***    |
| 30-39             | -2.953(-3.675,-2.232)***  | -2.025(-2.591,-1.458)***    | 488.665(465.026,512.305)***    | 103.529(92.114,114.943)***     |
| 40-49             | 10.752(10.040,11.465)***  | 1.865(1.307,2.423)***       | 329.889(308.158,351.620)***    | 83.832(73.156,94.509)***       |
| 50-59             | 19.658(18.952,20.364)***  | 3.699(3.145,4.252)***       | 216.250(194.826,237.675)***    | 26.587(16.052,37.121)***       |
| 60-69             | 21.055(20.351,21.759)***  | 3.518(2.966,4.071)***       | 238.260(216.882,259.639)***    | -6.372(-16.880,4.137)          |
| 70-79             | 21.840(21.136,22.544)***  | 2.955(2.403,3.508)***       | 327.946(306.543,349.348)***    | -14.295(-24.806,-3.783)**      |
| 80+               | 20.136(19.430,20.843)***  | 1.657(1.104,2.210)***       | 606.927(585.378,628.476)***    | -3.166(-13.703,7.371)          |
| Insurance         |                           |                             |                                |                                |
| UEBMI             | 24.836(24.761,24.911)***  | 3.370(3.314,3.426)***       | 460.750(458.489,463.011)***    | -169.804(-170.847,-168.760)*** |
| Year              |                           |                             |                                |                                |
| 2014.             | -9.875(-10.010,-9.739)*** | 6.351(6.283,6.418)***       | 47.211(43.862,50.559)***       | 28.734(27.360,30.109)***       |
| 2015.             | -5.505(-5.631,-5.379)***  | 6.434(6.376,6.492)***       | 140.101(136.907,143.295)***    | 20.257(18.993,21.522)***       |
| 2016.             | -7.145(-7.269,-7.021)***  | 7.896(7.838,7.955)***       | 202.006(198.858,205.155)***    | 47.987(46.728,49.246)***       |

The baseline represents the utilization and cost for an under 18-year-old female with Urban Residents' Basic Medical Insurance and ischemic stroke in 2013. 95% CI in parentheses. \*\*\*  $P < .001$ , \*\*  $P < .01$ .
